1 **Subfamily-specific differential contribution of individual monomers and the tether**  
2 **sequence to mouse L1 promoter activity**

3

4 Lingqi Kong<sup>1</sup>, Karabi Saha<sup>1</sup>, Yuchi Hu<sup>1</sup>, Jada N. Tschetter<sup>1</sup>, Chase E. Habben<sup>1</sup>, Leanne S.  
5 Whitmore<sup>2</sup>, Changfeng Yao<sup>3</sup>, Xijin Ge<sup>4</sup>, Ping Ye<sup>5</sup>, Simon J. Newkirk<sup>1</sup>, Wenfeng An<sup>1\*</sup>

6

7 <sup>1</sup>Department of Pharmaceutical Sciences, South Dakota State University, Brookings, SD 57007,  
8 USA; <sup>2</sup>Department of Immunology, University of Washington, Seattle, WA 98109, USA; <sup>3</sup>Anhui  
9 University of Traditional Chinese Medicine, Hefei, Anhui 230012, China; <sup>4</sup>Department of  
10 Mathematics & Statistics, South Dakota State University, Brookings, SD 57007, USA;

11 <sup>5</sup>Department of Pharmacy Practice, South Dakota State University, Brookings, SD 57007, USA

12

13 \*Correspondence: Wenfeng An, Department of Pharmaceutical Sciences, South Dakota State  
14 University, Brookings, SD, 57007, USA; Phone: 605-688-4767; Email: [wenfeng.an@sdstate.edu](mailto:wenfeng.an@sdstate.edu)

15

16 **Abstract**

17

18 **Background:** The internal promoter in L1 5'UTR is critical for autonomous L1 transcription and  
19 initiating retrotransposition. Unlike the human genome, which features one contemporarily  
20 active subfamily, four subfamilies (A\_I, Gf\_I and Tf\_I/II) have been amplifying in the mouse  
21 genome in the last one million years. Moreover, mouse L1 5'UTRs are organized into tandem  
22 repeats called monomers, which are separated from ORF1 by a tether domain. In this study, we  
23 aim to compare promoter activities across young mouse L1 subfamilies and investigate the  
24 contribution of individual monomers and the tether sequence.

25 **Results:** We observed an inverse relationship between subfamily age and the average number  
26 of monomers among evolutionarily young mouse L1 subfamilies. The youngest subgroup (A\_I

1 and Tf\_I/II) on average carry 3-4 monomers in the 5'UTR. Using a single-vector dual-luciferase  
2 reporter assay, we compared promoter activities across six L1 subfamilies (A\_I/II, Gf\_I and  
3 Tf\_I/II/III) and established their antisense promoter activities in a mouse embryonic fibroblast  
4 cell line. Using consensus promoter sequences for three subfamilies (A\_I, Gf\_I and Tf\_I), we  
5 dissected the differential roles of individual monomers and the tether domain in L1 promoter  
6 activity. We validated that, across multiple subfamilies, the second monomer consistently  
7 enhances the overall promoter activity. For individual promoter components, monomer 2 is  
8 consistently more active than the corresponding monomer 1 and/or the tether for each  
9 subfamily. Importantly, we revealed intricate interactions between monomer 2, monomer 1 and  
10 tether domains in a subfamily-specific manner. Furthermore, using three-monomer 5'UTRs, we  
11 established a complex nonlinear relationship between the length of the outmost monomer and  
12 the overall promoter activity.

13 **Conclusions:** The laboratory mouse is an important mammalian model system for human  
14 diseases as well as L1 biology. Our study extends previous findings and represents an  
15 important step toward a better understanding of the molecular mechanism controlling mouse L1  
16 transcription as well as L1's impact on development and disease.

17

## 18 **Keywords**

19 5'UTR, LINE-1, monomer, mouse, promoter, reporter assay, retrotransposon, subfamily, tether,  
20 transcription

21

## 22 **Introduction**

23

24 Long interspersed elements type 1 (LINE1s, or L1) are ubiquitous non-long terminal repeat  
25 (LTR) retrotransposons in mammals (1, 2), comprising 17% and 19% of the human and mouse  
26 genome, respectively (3, 4). Only a very small fraction of genomic L1 copies are full-length as

1 the vast majority of L1s suffer “structural defects”, such as 5'-truncation (5, 6), 5'-inversion (6-8),  
2 or internal rearrangement (9). A full-length L1 is 6-7 kb long (10, 11), encompassing a 5'  
3 untranslated region (5'UTR), two open reading frames (ORF1 and ORF2) and a 3' untranslated  
4 region (3'UTR). The 5'UTR contains an internal promoter, which is critical for autonomous L1  
5 transcription (12-14) and the initiation of L1 retrotransposition. The resulting L1 mRNA serves  
6 dual functions. First, it can be translated into two L1 proteins (ORF1p and ORF2p); both are  
7 essential for L1 retrotransposition (15, 16). Second, the same L1 mRNA is the preferred  
8 template for ORF2p-mediated reverse transcription over other cellular RNAs, in a phenomenon  
9 known as cis preference (17, 18). Based on comprehensive surveys of full-length elements  
10 among recently integrated human L1s (19, 20), approximately 30% of the new L1 insertions are  
11 full-length loci, which can potentially prime additional rounds of retrotransposition from their  
12 5'UTRs.

13  
14 Genomic L1 sequences are grouped into subfamilies according to their evolutionary history.  
15 Among L1s in the human genome, the oldest subfamilies L1MA to L1ME are shared with other  
16 mammals, but the younger L1PB and L1PA subfamilies are only found in primates. The  
17 youngest subfamily, L1PA1 (also called L1Hs), is specific to humans (21). A remarkable feature  
18 of L1 evolution is that new subfamilies frequently emerged by acquiring distinct 5'UTRs  
19 unrelated to those found in existing subfamilies (22). In the last ~70 million years during primate  
20 evolution, there were at least eight episodes of 5'UTR replacement. It is believed that new  
21 5'UTRs provide a mechanism for emergent subfamilies to avoid competition of host factors or to  
22 escape host suppression (22). The latest 5'UTR acquisition occurred ~40 million years ago  
23 (MYA) in ancestral anthropoid primates and gave rise to subfamily L1PA8 (23). The overall  
24 architecture of this new 5'UTR had been maintained as a single lineage in later subfamilies from  
25 L1PA7 to L1PA1. Nevertheless, these subfamilies were subjected to continued host-L1  
26 conflicts. For example, subfamilies L1PA6 to L1PA3 had evolved a ZNF93 binding motif in their

1 5'UTRs, which recruits ZNF93, triggering KAP1-mediated transcriptional silencing (24, 25). In  
2 contrast, a 129-bp deletion in the 5'UTR (inclusive of the binding site) allowed a subset of  
3 L1PA3, L1PA2, and L1PA1 to escape ZNF93 suppression (25). In addition, a single nucleotide  
4 change at position 333 created a functional m6A site, which first appeared in a subset of L1PA3  
5 and then dominated in L1PA2 and L1PA1 (26). Primate L1 5'UTRs also possess an antisense  
6 promoter, which drives the expression of a third open reading frame (ORF0) as well as chimeric  
7 fusion transcripts with upstream cellular genes (27-29).

8

9 The laboratory mouse is an important mammalian model system for human diseases as well as  
10 L1 biology (30-33). Despite sharing many ancestral L1 subfamilies with the human genome, the  
11 mouse genome is dominated by lineage specific L1 subfamilies, which were initially evolved  
12 from ancestral L1MA6 elements ~75 MYA at the divergence of the two species (4). A  
13 comprehensive analysis of full-length L1 sequences in the mouse genome identified 29 L1  
14 subfamilies that have undergone amplification since the split between mouse and rat about 13  
15 MYA (34). Overall, the evolution of mouse L1 subfamilies fits in the single lineage model as  
16 seen in the human genome. Similarly, young mouse L1 subfamilies frequently evolved by  
17 acquiring new 5'UTR sequences. Since the split from the rat, the mouse genome has  
18 experienced at least 11 episodes of 5'UTR replacement (34). The 29 L1 subfamilies feature  
19 seven types of 5'UTR sequences: Lx, V, Fanc, Mus, F, A and N (ordered by their first  
20 appearance in the genome from old to new) (34). The F type 5'UTR was resurrected from Fanc  
21 ~6.4 MYA and led to the formation of subfamilies F\_V to F\_I, the youngest of which ceased  
22 amplification about 2 MYA. The A type 5'UTR was recruited approximately 4.6 MYA and  
23 appeared in seven L1 subfamilies (A\_VII to A\_I), with A\_I being the youngest and active since  
24 0.25 MYA. Remarkably, the F type 5'UTR had been revived three times through recombination  
25 of the 5' portion of an F element with the 3' portion of an A\_III element, forming subfamilies  
26 Gf\_II, Gf\_I, and Tf\_III/II/I respectively. As in the human genome, the evolutionary timeline of

1 mouse L1s is also interspersed with episodes of multiple subfamilies coexisting over extended  
2 periods of time. For both human and mouse L1s, concurrently active subfamilies often  
3 possessed distinct 5'UTR promoter sequences (23, 34). This observation has led to a  
4 hypothesis that different promoters enabled subfamilies not to compete for the same  
5 transcription factors. Unlike the human genome, which features one contemporarily active  
6 subfamily, at least three subfamilies (Gf\_I, Tf\_I/II, and A\_I) have been amplifying in the mouse  
7 genome in the last one million years (34, 35). Interestingly, phylogenetic evidence suggests that  
8 Gf\_I and Tf\_I/II in the laboratory mouse genome might be acquired through inter-specific  
9 hybridization rather than evolved from within its own genome (34). In any case, it is unclear  
10 whether all three subfamilies remain currently active in the germ line of the laboratory mice.  
11  
12 Owing to their lineage-specific nature human and mouse L1 5'UTRs share no sequence  
13 homology. Moreover, mouse L1 5'UTRs are distinctly different from human L1's in that the  
14 former are organized into tandem repeats called monomers (11, 36). Such monomeric  
15 structures are also present in some other vertebrate L1s, including rat, hyrax, horse, elephant  
16 and opossum, but mouse L1 5'UTRs boast the highest number of monomers among all  
17 vertebrates (37). The number of monomers varies among individual L1s. For example, two  
18 recent full-length Tf insertions carried 5.7 and 7.5 monomers, respectively (38). Using reporter  
19 assays, it has been demonstrated 2-monomer is the minimal promoter structure to have  
20 significant transcriptional activity for L1spa, a Tf subfamily member (39). Similar tests have not  
21 been conducted for other mouse L1 subfamilies. Between monomers and ORF1 is a non-  
22 monomeric sequence, termed tether (40). In both A and Tf subfamily mouse promoters, tethers  
23 lacked significant transcriptional activity in reporter assays (39, 41). In this study, we aim to  
24 compare promoter activities across young mouse L1 subfamilies and investigate the  
25 contribution of individual monomers and the tether sequence using reporter assays.

26

## 1 **Results**

2

### 3 **Most full-length L1s from young mouse L1 subfamilies possess two or more monomers**

4 To profile mouse L1 promoter activities, we first analyzed the length distribution of mouse L1  
5 5'UTRs by counting the number of monomers for full- or near full-length elements. Since  
6 elements from the old subfamilies would have accumulated numerous debilitating mutations, we  
7 limited our analysis to seven recently active subfamilies, including A\_I, Tf\_I, Tf\_II, Gf\_I, Tf\_III,  
8 A\_II, and A\_III (listed from young to old). The estimated age for these L1 subfamilies ranges  
9 from 0.21 MYA for A\_I to 2.15 MYA for A\_III (Fig. 1A) (34). To tabulate elements carrying a  
10 specific number of monomers, L1 loci containing at least a partial 5'UTR are binned according  
11 to their respective 5' start point (Fig. 1B). For example, if the 5'UTR of an element starts within  
12 the third monomer, it would be placed into the monomer 3 (M3) bin. We observed a trend of  
13 5'UTR length shortening as subfamilies age. The vast majority of A\_I elements (1032 out of  
14 1125 or 91.7%), the youngest among this group, have at least two intact monomers. The  
15 distribution of A\_I elements peaks at M3 (357 out of 1125 or 31.7%). In other words, more loci  
16 start within the third monomer than any other 5'UTR positions. In contrast, 87.6% (816/931) of  
17 the A\_III loci, the oldest among this group, have fewer than two intact monomers, and 71.6%  
18 (667/931) of the loci start in monomer 2 (M2). This shortening trend is also evident if a  
19 comparison is made among closely related subfamilies (e.g., comparing among A\_I, A\_II and  
20 A\_III, or among Tf\_I, Tf\_II and Tf\_III). Overall, among the loci with at least a partial 5'UTR from  
21 these seven mouse L1 subfamilies, 61.0% (3515/5765) have >2 intact monomers, 29.7%  
22 (1710/5765) have >3 intact monomers, 14.9% (858/5765) have >4 intact monomers, and 7.8%  
23 (230/5765) have >5 intact monomers. At the extreme end of the spectrum, there are seven loci  
24 that have >10 intact monomers (i.e., falling into M11+ bin), all belonging to A\_I, Tf\_I, Tf\_II, and  
25 Gf\_I subfamilies. To calculate the average number of monomers for each subfamily, we  
26 excluded loci with either >10 monomers or truncated within the tether (T) (Fig.1C). On average,

1 L1 loci from the youngest subgroup carry >3 monomers (3.7, 3.5 and 3.1 monomers for A\_I,  
2 Tf\_I and Tf\_II, respectively), followed by Gf\_I (2.3 monomers), Tf\_III (2.5 monomers), A\_II (2.3  
3 monomers), and A\_III (1.5 monomers). An inverse relationship was observed between  
4 subfamily age and the average number of monomers among these seven mouse L1 subfamilies  
5 (simple linear regression:  $R = -0.91$ ,  $p = 0.004$ ).

6

## 7 **Two-monomer consensus sequences from six L1 subfamilies differ in their sense** 8 **promoter activities**

9 To quantitatively evaluate L1 promoter activity, we developed a single-vector dual-luciferase  
10 reporter assay (Fig.2A). In this vector design, a variant of L1 promoter drives the expression of  
11 firefly luciferase (Fluc), and an invariable HSV-TK promoter drives the expression of the Renilla  
12 luciferase (Rluc). The Rluc reporter cassette is embedded on the plasmid backbone as an  
13 internal control to normalize transfection efficiency. The L1 promoter activity is reported as the  
14 average Fluc/Rluc ratio among four replicate wells of NIH/3T3 cells. For this assay to work  
15 properly, it is important that Fluc and Rluc signals are both within the linear dynamic range (i.e.,  
16 not saturated). Furthermore, there should be minimal crosstalk between the two reporter  
17 cassettes. To this end, we performed a titration experiment using varying amount of pCH117  
18 plasmid per reaction in a 96-well assay format. Note the L1 promoter in the pCH117 plasmid  
19 was derived from an active human L1, L1RP (42). The Fluc and Rluc signals scaled  
20 proportionally to the amount of plasmid from 5 ng to 20 ng but started to plateau when 25 ng or  
21 more plasmid was used (Fig.2B). The Fluc/Rluc ratio was relatively stable within this range  
22 (Fig.2C). In subsequent assays, 10 ng plasmid DNA was used per well for all promoter assays.

23

24 To compare promoter activities across mouse L1 subfamilies, we first synthesized the  
25 consensus 5'UTR sequence of six subfamilies (Tf\_I, Tf\_II, Tf\_III, Gf\_I, A\_I, and A\_II). As the  
26 length of the consensus 5'UTR varies among these subfamilies (34), we retained only the first

1 two monomers plus the tether in this experiment (Fig.2D) (promoter sequences in Additional file  
2 1: Table S1). This decision was based on two observations. First, for the L1spa element, it has  
3 been reported that a minimum of two monomers is required for detectable promoter activity (39).  
4 Second, as described earlier (Fig.1B), most of the elements from the young L1 subfamilies  
5 retain at least two intact monomers. We removed A\_III subfamily from this experiment as only a  
6 small fraction of A\_III elements have two intact monomers, featuring the lowest average number  
7 of monomers (Fig.1C). We incorporated two control plasmids in our dual-luciferase assays.  
8 pLK037 is a no-promoter negative control. It lacks a promoter sequence upstream of the Fluc  
9 coding sequence but contains an intact Rluc cassette; hence, its Fluc/Rluc ratio represents the  
10 assay background. To facilitate comparison of activities among different L1 promoters, we  
11 normalized the Fluc/Rluc ratio of each promoter construct to pLK037 (i.e., setting the Fluc/Rluc  
12 ratio of pLK037 to 1). pCH117 is a positive control. In Figure 2D, the normalized promoter  
13 activity for pCH117 (“L1RP”) is 914, which can be interpreted as that human L1RP 5’UTR  
14 possesses a promoter activity 914-fold above the assay background. As pCH117 usually shows  
15 the highest promoter activity among all the constructs tested, its normalized promoter activity is  
16 also an indication of the assay dynamic range. Note the assay dynamic range fluctuates to  
17 some extent from experiment to experiment (e.g., 700- to 1200-fold above background), likely  
18 due to unpredictable variations in cell status and transfection procedures. However, such  
19 fluctuations should not substantially alter the relative fold difference among promoters.  
20  
21 For two-monomer consensus sequences, we found the highest activity in the Tf\_II subfamily  
22 (394-fold above assay background), followed by A\_I (274-fold), Tf\_I (214-fold), Tf\_III (189-fold),  
23 A\_II (114-fold), and the lowest activity in the Gf\_I subfamily (59-fold). Overall, there appears to  
24 be a weak inverse relationship between subfamily age and two-monomer consensus promoter  
25 activity among these six subfamilies (simple linear regression:  $R = -0.62$ ,  $p = 0.19$ ) (Fig.2E). In



1 this regard, subfamily Gf\_I may be considered as an outlier, which is relatively middle-aged  
2 (0.75 MYA) but showed significantly less activity (15% of that of Tf\_II).

3

#### 4 **Differential and subfamily-dependent contribution of monomer 2, monomer 1, and tether** 5 **to mouse L1 promoter activity**

6 DeBerardinis and colleagues have previously investigated the interactions among monomers  
7 and the tether sequence based on a single promoter variant, L1spa, a prototypic mouse Tf  
8 element (38, 39). Specifically, they observed that tether alone lacked promoter activity,  
9 monomer 1 (M1) alone had some activity, either M1-T or M2 alone had about 2-fold activity  
10 above assay background, M2-M1 had about 3-fold activity, but three or more monomers  
11 showed even higher activity. These observations led to the conclusion that two monomers are  
12 required for L1 promoter activity (39). When aligned to Tf\_I and Tf\_II consensus sequences,  
13 L1spa showed similar levels of divergence to Tf\_I and Tf\_II in the 5'UTR and ORFs, but much  
14 higher similarity to Tf\_I than Tf\_II in the 3'UTR (e.g., all 6 SNPs are against Tf\_II). Thus, we  
15 consider L1spa as a member of the Tf\_I subfamily.

16

17 To validate and expand previous findings, we conducted similar studies using consensus  
18 promoter sequences for three different subfamilies, including Tf\_I, A\_I, and Gf\_I (promoter  
19 sequences in Additional file 1: Table S2). For Tf\_I subfamily (Fig.3A), consistent with the  
20 previous report using L1spa 5'UTR (39), the promoter construct with two tandem monomers and  
21 the tether (M2-M1-T) showed 6.0-fold higher activity than the construct containing M1 and the  
22 tether (M1-T). The previous study showed minimal activity from tether alone or M1 alone, but  
23 M2 alone was not tested. The wide dynamic range of our assay allowed us to differentiate the  
24 relative activities of M2, M1, and tether. In the context of the consensus sequence, M2 alone  
25 displayed an activity equivalent to 22.2% of the M2-M1-T sequence. M1 alone is about 2-fold  
26 less active (13.0% of M2-M1-T) but remains 12-fold above the assay background. Tether alone

1 showed even less activity (4.1% of M2-M1-T) but remained 11.6-fold above the assay  
2 background (Welch t-test,  $p = 0.002$ ). To confirm such residual promoter activities, we included  
3 two additional control plasmids (Fig.3A). First, we replaced the promoter sequence with a 205-  
4 bp fragment from the green fluorescent protein (GFP) coding sequence, equivalent to the length  
5 of Tf\_I tether. As expected, this 205-bp GFP (GFP205) sequence showed no promoter activity  
6 (0.6-fold relative to the assay background). Second, we placed the tether sequence in its  
7 antisense orientation (T\_AS). Interestingly, the antisense Tf\_I tether had 8.2-fold higher activity  
8 than the assay background (Welch t-test,  $p < 0.001$ ). These results suggest that the Tf\_I tether  
9 sequence has some weak transcriptional activities in both sense and antisense orientations. To  
10 aid in the interpretation of the contribution of individual domains, we diagrammed promoter  
11 activities along with domain locations in an integrated manner (Fig.3B). For Tf\_I subfamily, M2-  
12 M1-T has the highest activity, 3.2-fold higher than any other permutations of its subdomains.  
13 Comparing M1-T with T and M1, it seems that the activity of M1-T is the sum of M1 and T alone,  
14 suggesting an additive role. The addition of M2 to M1-T appears to be synergistic, as the  
15 resulting M2-M1-T construct is 6-fold higher than M1-T. To probe the contribution of M1 to  
16 overall two-monomer promoter activity, we generated a synthetic construct in which M2 is  
17 directly placed upstream of the tether (M2-T) (Fig.3A). Comparing M2-T with M2-M1-T, the  
18 deletion of M1 reduced the promoter activity by at least 3-fold. This result suggests that M1  
19 positively contributes to the 2-monomer promoter activity for Tf\_I subfamily. Taken together, all  
20 three domains contribute positively to the overall two-monomer 5'UTR activity in Tf\_I subfamily.  
21  
22 For A\_I subfamily, M2-M1-T displayed 30.4-fold higher activity than M1-T (Fig.3C). The  
23 reduction is even more dramatic than that observed for the Tf\_I subfamily. Then we examined  
24 the activities of each domain: M2, M1, and tether alone. Surprisingly, the A\_I M2 showed  
25 remarkable promoter activity on its own, with 3.6-fold higher activity than the two-monomer  
26 construct. In contrast, M1 and tether had low but detectable amount of activity relative to the

1 assay background. Specifically, both had less than 3% of M2-M1-T but still 7~8-fold above the  
2 assay background (Welch t-test,  $p = 0.002$  for M1 and  $p < 0.001$  for T). However, combining M1  
3 and T together did not lead to any substantial increase in promoter activity (10-fold above  
4 background for M1-T). The deletion of M1 from M2-M1-T reduced the promoter activity by a  
5 mere 7% (comparing M2-T with M2-M1-T), suggesting M1 contributes little to the overall two-  
6 monomer promoter. On the other hand, the presence of tether sequence reduced M2 activity by  
7 4-fold (comparing M2 and M2-T), indicating that A\_I tether significantly suppresses the promoter  
8 activity of M2 and likely plays a negative role in the context of two-monomer promoter. Thus, M2  
9 dominates in its contribution to the overall A\_I promoter activity. Similar to the experiment with  
10 Tf\_I promoters, a 202-bp fragment from the GFP coding sequence (GFP202), equivalent to the  
11 length of A\_I tether, showed little promoter activity (1.5-fold above background). The antisense  
12 A\_I tether had 3-fold higher activity than the assay background (Welch t-test,  $p < 0.001$ ). These  
13 results suggest that the A\_I tether sequence also has some weak transcriptional activities in  
14 both sense and antisense orientations. To summarize, M2 is the major contributor of two-  
15 monomer promoter activity for A\_I subfamily, the tether negatively regulates M2 activity in the  
16 context of two-monomer 5'UTR, while the role of M1 is minimal (Fig.3D).

17

18 Similar trend was observed for Gf\_I promoter (Fig.3C). Gf elements were first described in 2001  
19 by Goodier and colleagues (35). The Gf\_I subfamily (34) conforms to pattern II of Gf promoters  
20 in the original scheme. As described earlier, the consensus Gf\_I M2-M1-T construct had much  
21 weaker promoter activity than the corresponding Tf\_I and A\_I constructs (27.4% and 21.4%,  
22 respectively; Fig.2D). Nevertheless, it remained 3.2-fold more active than M1-T (Welch t-test,  $p$   
23  $< 0.001$ ), although the magnitude of reduction was not as dramatic as in A\_I and Tf\_I. The  
24 activities of individual domains, M2, M1 and the 313-bp tether, were 20.2%, 9.8%, and 20.4% of  
25 M2-M1-T, respectively, but remain significantly above the assay background (Welch t-test,  $p =$   
26 0.003, 0.002 and 0.0002, respectively). The antisense 313-bp tether (T\_AS) also had

1 substantial amount of promoter activity (26.6% of M2-M1-T; Welch t-test,  $p = 0.001$  against the  
2 assay background). Note the 313-bp tether includes a truncated 64-bp monomer at its 5' end.  
3 We also subcloned the tether sequence without the 64-bp truncated monomer. The shortened  
4 249-bp tether had detectable activities in both sense (T249, 11.8% of the 2-monomer promoter;  
5 Welch t-test,  $p = 0.03$  against assay background) and antisense orientation (T249\_AS, 13.7% of  
6 2-monomer promoter; Welch t-test,  $p < 0.001$  against assay background). The interactions  
7 among individual domains for subfamily Gf\_I are distinctly different from both Tf\_I and A\_I (Fig.  
8 3F). For Gf\_I, the interaction between M1 and T appears to be additive when comparing M1-T  
9 with M1 and T alone. On the other hand, M2 and M1-T are somewhat synergistic as M2-M1-T is  
10 about 2-fold the sum of M2 and M1-T. In comparison, the deletion of M1 only reduced the  
11 promoter activity for Gf\_I by 13%, suggesting M1 plays a minor role in Gf\_I subfamily. Thus, the  
12 two-monomer activity of Gf\_I is mainly the result of interaction between M2 and tether.

13

#### 14 **Length of monomer 3 has a U-shaped effect on overall promoter activity**

15 Thus far, we have shown the contribution of individual M2, M1, and T sequences in the context  
16 of a two-monomer 5'UTR for Tf\_I, A\_I, and Gf\_I subfamilies. However, many L1 promoters  
17 contain more than two monomers. Indeed, for the two youngest mouse L1 subfamilies, Tf\_I and  
18 A\_I, more L1 promoters start in M3 than in any other positions (157 out of 513 or 30.6%, and  
19 357 out of 1125 or 31.7%, respectively) (Fig. 1B). On the other hand, the distribution of the 5'  
20 start positions in M3 is, albeit varied, nonrandom. For example, 16.6% (26/157) of the Tf\_I loci  
21 containing M3 start at nucleotide position 83 (Fig. 4A) and 26.3% (94/357) of the A\_I loci  
22 containing M3 start at nucleotide position 86 (Fig. 4B). To dissect the role of varied lengths of  
23 monomer 3, we conducted a direct comparison between M3-M2-M1-T and M2-M1-T for both  
24 Tf\_I and A\_I subfamilies (Fig. 4C-D) (promoter sequences in Additional file 1: Table S3). Indeed,  
25 both three-monomer consensus constructs were more active than the two-monomer  
26 counterparts. For Tf\_I subfamily, the three-monomer promoter was 2.4-fold higher than the two-

1 monomer version and was only 17.4% lower than the reference L1RP promoter (Fig.4C). For  
2 A\_I subfamily, the three-monomer promoter was 4.0-fold higher than the two-monomer version  
3 and even outperformed the highly active L1RP promoter by 19.3% (Fig.4D). To study the impact  
4 of an incomplete monomer on the overall promoter activity, we created series of A\_I and Tf\_I  
5 promoter constructs by truncating the third monomer stepwise for 40 bp. For Tf\_I subfamily, the  
6 deletion of the first 40 bp reduced the promoter activity to 74.0% of the three-monomer  
7 construct (Fig.4C). The removal of the first 80 bp reduced the promoter activity further to 36.5%  
8 of the three-monomer construct. Deletion of the first 122 bp had additional effect (down to  
9 23.6% of the three-monomer construct). However, this diminishing trend was reversed when the  
10 promoter was further truncated. The promoter activity was restored to 31.6% of the three-  
11 monomer construct when the first 162 bp was deleted. The deletion of the entire third monomer  
12 (212 bp), giving rise to the two-monomer construct, restored the activity to 42.3% of the three-  
13 monomer construct. Similar patterns were seen with the vector series for A\_I subfamily (Fig.4D).  
14 The promoter activity was reduced to 45.6%, 18.0%, 15.7% of the three-monomer construct  
15 with 40-, 80-, 122-bp deletions, respectively, and then rebounded back to 18.1% and 25.3% of  
16 the promoter activity with deletion of 160 bp and the entire 208-bp M3, respectively. Thus, for  
17 both subfamilies, the first 80 bp of M3 has a positive impact on overall promoter activity but the  
18 last 80 bp negatively regulates the promoter activity. The interaction between the length of M3  
19 and the overall promoter activity is characteristic of an asymmetrical U-shaped relationship  
20 (Fig.4C-D).

21

## 22 **Two-monomer consensus sequences have antisense promoter activities**

23 The human L1 contains an antisense promoter activity (27), which affects as many as 4% of the  
24 human genes (43). An antisense promoter activity has been previously reported in ORF1 region  
25 of the mouse L1 (44). However, it remains unclear whether mouse L1 5'UTRs have antisense  
26 promoter activities. To uncover potential antisense promoter activities, we inverted the two-

1 monomer consensus sequences from the six young mouse L1 subfamilies and compared them  
2 to their sense-oriented counterparts (Fig.2D). In our control experiment, the antisense oriented  
3 L1RP 5'UTR showed 106.2-fold activity above the experimental background, equivalent to  
4 11.6% of that of the sense promoter. The relative strength of antisense versus sense promoter  
5 activity for L1RP reported here is consistent with a previous report (45), which showed 8-fold  
6 lower activity for the antisense promoter than the sense promoter by both Northern blot and a  
7 luciferase-based reporter assay in human HeLa cells. In this context, all six L1 subfamilies  
8 demonstrated detectable levels of antisense promoter activities (Fig.2D). The three youngest  
9 subfamilies (A\_I, Tf\_I, and Tf\_II) all had >40-fold activity above the assay background in the  
10 antisense orientation, equivalent to 15.0%, 21.0%, and 12.1% of the activity from the  
11 corresponding sense promoter, respectively. The antisense sequence of A\_II subfamily showed  
12 21.5-fold activity in the reporter assay, which is equivalent to 18.8% of the sense promoter. Gf\_I  
13 and Tf\_III subfamilies had the lowest antisense promoter activities (13.1 and 10.1-fold above  
14 assay background, respectively), corresponding to 22.3% and 5.3% of their sense promoter  
15 counterparts.

16

## 17 **Discussion**

18

19 The two-monomer 5'UTRs tested in this study are consensus sequences as defined by the  
20 Boissinot group in 2013 (34). For subfamilies with recent periods of activity, it is expected that  
21 individual copies be similar to the consensus sequence (46). Indeed, this prediction is true for  
22 the three youngest subfamilies (A\_I, Tf\_I, and Tf\_II; Additional file 1: Table S4). The reference  
23 mouse genome contains 21 identical loci and 134 single-mismatch loci for the 608-bp A\_I two-  
24 monomer 5'UTR sequence, three identical loci and 33 single-mismatch loci for the 614-bp Tf\_I  
25 two-monomer sequence, and 18 single-mismatch loci for Tf\_II two-monomer sequence. In  
26 contrast, for the middle-aged Gf\_I subfamily, only three single-mismatch loci are found for its

1 726-bp two-monomer 5'UTR sequence. The older Tf\_III and A\_II subfamilies do not have any  
2 loci carrying less than three mismatches. Therefore, our results not only reflect the promoter  
3 activities of the consensus 5'UTR sequences tested but can potentially be extended to a  
4 number of endogenous mouse L1 loci, especially for A\_I, Tf\_I, Tf\_II, and Gf\_I.  
5  
6 In the context of two-monomer 5'UTRs, the inclusion of M2 upstream of M1 is essential for its  
7 enhanced promoter activity. The enhancement by M2 is 6.0-fold for Tf\_I, 30.4-fold for A\_I, and  
8 3.2-fold for Gf\_I (Fig.3; comparing M2-M1-T with M1-T for each subfamily). When normalized to  
9 the control L1RP promoter, it is evident that the activity of A\_I M2 consensus (108.6% of L1RP)  
10 far exceeds that of Tf\_I (7.7% of L1RP) and Gf\_I (1.2% of L1RP) in NIH/3T3 cells (Fig.3). Note  
11 the definition of individual monomers is not necessarily consistent in the literature across mouse  
12 L1 subfamilies. As expected, sequence alignment shows extensive sequence divergence  
13 among A\_I, Tf\_I, and Gf\_I M2 sequences used in this study (Additional file 2: Fig.S1). For the  
14 208-bp A\_I M2 consensus sequence (5'-GTGCCTGCCC...GTGGAACACA-3'), we defined its  
15 boundary in the A\_I 5'UTR consensus sequence by following the convention established by  
16 Loeb and colleagues when type A monomer was first described (11) (Additional file 2: Fig.S2).  
17 Comparing with previously described A monomer consensus sequences (41, 47), the A\_I M2  
18 sequence has three mismatches. BLAST search of this A\_I M2 sequence in the mm10 mouse  
19 genome assembly returns 67 identical hits and 138 single-mismatch hits (Additional file 1: Table  
20 S4). Coincidentally, this A\_I M2 sequence is identical to the A monomer subtype 1 recently  
21 defined by the Smitch group using a profile-HMM based unsupervised approach (48). For the  
22 212-bp Tf\_I M2 consensus sequence (5'-GACAGCCGGC...GTGGGCCGGG-3'), we followed  
23 the convention initially established the Kazazian group (38, 39) (Additional file 2: Fig.S3). It  
24 differs from Naas's version (38) by one nucleotide at position 171 and from DeBerardinis's  
25 version (39) by an additional nucleotide at position 24. Seventeen copies identical to the  
26 consensus Tf\_I M2 sequence are present in the mouse genome (Additional file 1: Table S4).

1 Note the T monomers recently identified by the profile-HMM approach would start at nt 135 (5'-  
2 GGTGCGCCAG...-3') (48). The 212-bp Tf\_I M2 tested here displays a single mismatch with T  
3 monomer subtype 22 at nt 24 and with subtype 25 at nt 102, respectively. The 206-bp Gf\_I M2  
4 consensus sequence (5'-TGAGAGCACG...ACCTTCCTGG-3') follows the original boundary  
5 definition but differs from Goodier's version by two nucleotides at nts 152-153 (35) (Additional  
6 file 2: Fig.S4). It has 121 identical copies in the mouse genome (Additional file 1: Table S4).  
7 Note the Gf monomer subtype 2 defined by the profile-HMM approach (48) would start at  
8 position 204 but is otherwise identical to the Gf\_I M2 sequence tested in this study. How  
9 individual SNPs affect each monomer variant's activity necessitates future studies.

10

11 Our study highlights the difference between M2 and M1 in promoter activity. The most dramatic  
12 example is from the A\_I subfamily. In head-to-head comparison, its M1 alone has a mere 7.7-  
13 fold activity above assay background but its M2 is 145-fold more active than M1 (Fig.3B). This  
14 functional difference reflects the sequence divergence between them. The A\_I M2 and M1 are  
15 86.5% (180 out of 208 nucleotides) identical (Additional file 2: Fig.S2). Besides 18 SNPs, M1  
16 possesses three short deletions, including the deletion of one copy of the tandem ACTCGAG  
17 motif noted previously (48). For Tf\_I subfamily, the M2 and M1 are 76.6% (164/214) identical  
18 overall (Additional file 2: Fig.S3). The divergence is concentrated in the second half of the  
19 monomers, with the putative YY1 binding motif preserved in M1. Despite the larger difference  
20 than seen in subfamily A\_I, Tf\_I's M2 and M1 only differed in promoter activity by 1.7-fold  
21 (Fig.3A). For subfamily Gf\_I, its M2 and M1 are highly similar with 96.6% identity (200/207)  
22 (Additional file 2: Fig.S4). The seven mismatches are located toward the 3' end of the  
23 sequence. At the functional level, M2 is 2-fold more active than M1 (Fig.3C). Future studies are  
24 necessary to pinpoint the key nucleotide positions that are responsible for differential promoter  
25 activity between these M2 and M1 sequences. It should also be noted that, while our study  
26 focused on a few consensus monomers, the mouse genome contains a large number of A or Tf



1 monomer subtypes, which display different modes of position preference within a 5'UTR  
2 monomer array (48). It is entirely possible that a strong monomer, similar to A\_I M2, is  
3 positioned directly upstream of a tether, forming a highly active one-monomer-tether 5'UTR.  
4 Therefore, one could not automatically assume low promoter activity for a shortened M1-T like  
5 locus.

6  
7 Unlike monomer sequences, the tether sequences share a significant amount of homology  
8 among the three subfamilies (Additional file 2: Fig.S5). The tethers for subfamily A\_I and Tf\_I  
9 are similar in length and 76.6% identical. Both have modest activities (7.7-fold or 11.6-fold  
10 above assay background, respectively) (Fig.3A-B). For subfamily Gf\_I, two different versions of  
11 tether were tested. One is 249 bp long, which can be divided into a 3' 208-bp segment (with  
12 84.1% identity to Tf\_I tether) and a 5' 41-bp segment (equivalent to 5' extension into the  
13 corresponding Tf\_I M1 region). It showed 8.8-fold activity above assay background (Fig.3C).  
14 The other is 313 bp long. The addition of the extra 64 bp truncated Gf\_I monomer rendered the  
15 longer tether sequence slightly more active (15.2-fold above assay background). Despite the  
16 modest activity on its own, the tether sequence seems always augment the activity from M2 or  
17 M1 to some extent. The only exception is when it is coupled with A\_I M2 as described earlier.  
18 The molecular mechanism via which the tether contributes to the overall promoter activity is  
19 unknown. The high level of sequence conservation among all A, Tf, Gf and F subfamilies  
20 reflects its common ancestry (34). Though highly speculative it is possible that the tether region  
21 has other regulatory roles during L1 replication cycle.

22  
23 We demonstrated antisense promoter activity for two-monomer 5'UTR constructs from all seven  
24 evolutionarily young mouse L1 subfamilies examined (Fig.2D). The amount of antisense  
25 promoter activity is a fraction of the corresponding sense promoter activity, ranging from 5% to  
26 22%. Notably, when tested in multiple cell lines, the antisense promoter activity of human

1 L1PA1 5'UTR falls within this range (11.6% in NIH/3T3 cell line [this study], 12.5% in HeLa cell  
2 line (45), 7.8% in human embryonal carcinoma 2102Ep cell line (29), and 25% to 33% in human  
3 embryonic stem cell lines (29)). The relative contribution of M2, M1, and tether domains to the  
4 overall antisense promoter activity remains unclear. When the tether sequence from subfamily  
5 Tf\_I, A\_I, and Gf\_I was tested in the antisense orientation, it showed 2.9%, 1%, and 26.5% of  
6 the corresponding two-monomer promoter, respectively (Fig.3), suggesting only Gf\_I tether  
7 contributes substantially to the antisense promoter activity. Our findings on antisense promoter  
8 activity in mouse L1 5'UTRs contract with a previous study, which found minimal activity for two  
9 individual A type monomers and a tether sequence when tested in the antisense orientation  
10 (41). This discrepancy may be explained by differences in the sensitivity and dynamic range of  
11 the reporter assays used and the promoter sequences tested. On the other hand, our results  
12 are consistent with a recent analysis of cap analysis of gene expression (CAGE) data from  
13 mouse embryonic testes, showing strong antisense transcription start site (TSS) signals for Gf  
14 and T monomers (48).

15  
16 In reference to the computationally defined monomers, the 5' termini of endogenous L1 loci  
17 display a tendency of starting from certain nucleotide positions. The 5' truncation points of Tf  
18 monomers, including the two prototypic full-length Tf insertions, are clustered at nts 70-110 (38,  
19 39, 48). This region overlaps with a putative YY1 binding motif GCCATCTT at nts 80-87, which  
20 has been postulated to play a similar function in controlling transcription initiation as reported for  
21 human L1 5'UTR (39, 48, 49). Earlier observations from a limited number of A type loci  
22 indicated two clusters of 5' truncation points relative to a complete monomer (two monomers  
23 start at nts 24-25 and ten start at nts 70-85) (11, 47, 50). A recent genome-wide analysis  
24 confirmed the predominance of truncation points within a 30-bp region at nts 70-100 for the 5'  
25 most A monomers (48). Notably, a tandem ACTCGAG motif of unknown function is present at nt  
26 98-111 (36, 48). Our own analysis at single-base resolution replicated these findings, showing a

1 broader distribution with a dominant peak at nt 83 for Tf\_I monomers (Fig.4A) and a much  
2 tighter distribution with a dominant peak at nt 85 for A\_I monomers (Fig.4B). However, the role  
3 of a partial or incomplete monomer at the beginning of a mouse L1 5'UTR had not been  
4 addressed by previous studies. Using the consensus A\_I and Tf\_I 5'UTR as a model, we found  
5 a complex U-shaped relationship between the length of the outer M3 and the overall promoter  
6 activity (Fig.4C-D). As expected, promoters with three full monomers are much more active than  
7 those with two monomers for both subfamilies. However, the lowest promoter activities were  
8 found when 122 bp (but not when additional sequences) was removed from the 5' end of the  
9 M3. Thus, the contribution of M3 sequence to overall promoter activity is not simply proportional  
10 to its length. This phenomenon is consistent with a model in which both M3 and its downstream  
11 monomers promote parallel transcription initiation events (11). Under this model, the deletion of  
12 122 bp from M3 abolishes transcription initiation from M3 and unmasks negative regulation of  
13 transcription initiation from M2 by the remaining M3 sequence, leading to much reduced overall  
14 transcription output. Addition deletion of M3 sequence eliminates the negative regulation and  
15 enables unimpeded transcription initiation from M2. The consensus M3 and M2 sequences are  
16 not identical though: they differ by two nucleotides in A\_I (Additional file 2: Fig.S2), and by three  
17 nucleotides in Tf\_I (Additional file 2: Fig.3). Nevertheless, according to the distribution of the 5'  
18 start positions of endogenous loci that are 5' truncated within M3 (Fig. 4A-B), one would predict  
19 that most of such Tf\_I and A\_I elements be transcribed at lower levels than an element with  
20 either three or two full-length monomers. This observation raises an interesting question about  
21 the molecular processes leading to such a 5' truncation pattern and any advantages or  
22 disadvantages toward subsequent rounds of L1 replication.

23

## 24 **Conclusions**

25

1 The multimeric nature of mouse L1 5'UTRs presents a challenge to investigate mouse L1  
2 transcriptional regulation. Accordingly, unlike the human L1 5'UTR, many aspects of mouse L1  
3 transcription remain poorly understood. In this study, aided by synthetic biology and report  
4 assays with a wide dynamic range, we compared sense promoter activities and discovered  
5 antisense promoter activities from six evolutionarily young mouse L1 subfamilies. Expanding  
6 upon a pioneering study featuring a single Tf\_I element, we determined contribution of  
7 monomer and tether sequences among three main lineages of evolutionarily young mouse L1s:  
8 A\_I, Tf\_I and Gf\_I. Our work validated that, across multiple subfamilies, having the second  
9 monomer is always much more active than the corresponding one-monomer construct. For  
10 individual promoter components (M2, M1, and tether), M2 is consistently more active than the  
11 corresponding M1 and/or the tether for each subfamily. More importantly, we revealed intricate  
12 interactions between M2, M1 and tether domains and such interactions are subfamily specific.  
13 Using three-monomer 5'UTRs as a model, we established a complex nonlinear relationship  
14 between the length of the outmost monomer and the overall promoter activity. Overall, our work  
15 represents an important step toward elucidating the molecular mechanism of mouse L1  
16 transcriptional regulation and L1's impact on development and disease.

17

## 18 **Materials and Methods**

19

### 20 ***Computational analysis of mouse L1 5'UTR start positions***

21 BLAST+, a suite of command-line tools to run BLAST locally (51), was used to search for the  
22 promoter region (query sequence) in each L1 sequence (subject sequence). For each  
23 subfamily, we created a query sequence containing 11 monomers and the corresponding tether  
24 sequence by removing the 5' partial monomer from the consensus sequence (34) and  
25 appending copies of the last full-length monomer to the 5' end of the consensus sequence until  
26 there was a total of 11 monomers. The monomers duplicated in the 11-monomer query

1 sequences were the 212-bp M3 for Tf\_I and Tf\_II, the 214-bp M3 for Tf\_III, and the 208-bp M3  
2 for A\_I, A\_II and A\_III. We derived four separate 11-monomer query sequences for Gf\_I,  
3 corresponding to the four 5'UTR monomer organization patterns defined previously (35).  
4 However, pattern III was later excluded from downstream analyses since nearly all its  
5 alignments were short and overlapped with alignments with other patterns. Patterns I, II and IV  
6 differ from each other in tether length (377, 313, and 250 bp, respectively). Pattern II is  
7 considered as a prototype for Gf\_I; its 206-bp M2 was duplicated to make the 11-monomer  
8 query. The same M2 was used to populate all monomer positions for patterns I and IV. L1  
9 sequences belonging to subfamilies Tf\_I, Tf\_II, Tf\_III, Gf\_I, A\_I, A\_II and A\_III were extracted  
10 from the mouse genome assembly GRCm38/mm10 using SeqTailor (52), and saved as  
11 subfamily-specific subject sequence files. The input BED files containing genomic coordinates  
12 for individual L1 loci were derived from mm10 Repeat Library db20140131, which is available  
13 from the RepeatMasker website (53). For each subfamily, the query sequence was searched  
14 against each subject sequence in the subject sequence file using BLAST+. The parameters  
15 used were “-perc\_identity 0, -num\_threads 4, -max\_target\_seqs n” (where n is a number greater  
16 than the total number of sequences in the local database). The output alignment file was then  
17 parsed in RStudio with R version 3.6. We filtered out alignments that do not end in the last 10  
18 bases of the corresponding tether region of the query sequence and alignments that do not start  
19 within the first 10 bases of the subject L1 sequence. This filtering step removed potential loci  
20 with a 3' truncated tether and/or with a chimeric 5'UTR composed of monomers from divergent  
21 L1 subfamilies. For Gf\_I, five loci were shared between patterns I and II, and three of them were  
22 also shared with pattern IV. The redundant entries were removed, and the five loci were  
23 retained under pattern II only. To plot the 5' start position of L1 sequences in reference to the  
24 monomer or tether positions in the query sequence, the start of the alignment in query was  
25 separated into 12 bins (tether, and M1 to M11; see Fig.1B). To calculate the average number of  
26 monomers for each subfamily, we excluded the small number of loci that start either in the

1 tether or M11+ (see Fig.1C). The 5' start position of each locus relative to the specific monomer  
2 position in the query was used to determine the fractional length of the 5'UTR. The copy number  
3 of two-monomer promoters and individual monomer and tether domains in the mouse genome  
4 (see Additional file 1: Table S4) was determined in a similar fashion using BLAST+.

5

## 6 ***Plasmid construction***

7 A detailed list of the promoter constructs, including primers and the corresponding promoter  
8 sequences, is provided as supplemental tables (Additional file 1). pCH036 is the base vector for  
9 inserting individual promoter sequences between two heterotypic SfiI sites (Fig.2A;  
10 SfiI\_L=GGCCAAAA/TGGCC and SfiI\_R=GGCCTGTC/AGGCC; "/" indicates the cleavage site)  
11 immediately upstream of the Fluc reporter gene. It looks nearly identical to all the derivative dual  
12 luciferase assay vectors except the "L1 promoter" sequence is substituted by a 48-bp multiple  
13 cloning site segment. Originating from pESD202, the double-SfiI cassette enables directional  
14 inert swapping via a single, robust restriction/ligation cycle (54). We derived pCH036 from  
15 pLK003. The latter was similar in vector architecture to pCH036 but, instead of the Fluc reporter  
16 gene, pLK003 had a firefly luciferase based retrotransposition indicator cassette (FlucAI). To  
17 make pCH036, we amplified the Fluc reporter gene from pGL4.13 (Promega) using PCR  
18 primers WA1312 5'-

19 AAAACCTAGGGGCTGTCAGGCCATGGAAGATGCCAAAACATTAAGAAG-3' and WA1314  
20 5'- AAAAGGTACCTTACACGGCGATCTTGCCG-3'. The backbone fragment of pLK003 was  
21 prepared by a double digestion with AvrII and KpnI, removing the FlucAI cassette, and  
22 subsequently ligated to the Fluc PCR fragment with the same sticky ends. In the resulting  
23 pCH036, the second SfiI site (i.e., SfiI\_R) is immediately upstream of the start codon of Fluc.

24

25 pCH117 is a positive control vector that contains the human L1RP 5'UTR as the "L1 promoter".

26 To make pCH117, we amplified the L1RP 5'UTR from pYX014 (55). The PCR product was

1 digested with Sfil (New England Biolabs), gel purified, and ligated with Sfil-digested pCH036.  
2 pLK037 is a negative control vector that contains an empty double-Sfil cassette upstream of the  
3 Fluc reporter gene. It was derived by Sfil digestion of pCH117, blunting of the 3' overhangs with  
4 Klenow fragment of E. coli DNA polymerase I (New England Biolabs), and self-ligation of the  
5 backbone fragment. pLK043, pLK044, and pLK045 are control vectors that contain 202-, 205-,  
6 and 250-bp of EGFP coding sequence in the double-Sfil cassette, respectively. The  
7 corresponding EGFP sequences were amplified from pWA003 (55) by using the same reverse  
8 primer paired with three different forward primers. The PCR product was digested with Sfil, gel  
9 purified, and ligated with Sfil-digested pCH036.

10

11 The three-monomer Tf\_I consensus promoter in pLK086 was derived from a synthetic DNA  
12 fragment that is flanked by Sfil\_L and Sfil\_R restriction sites. Primers were designed to serially  
13 truncating M3 by 40-, 80-, 122-, and 162-bp from the 5' end. The resulting PCR products were  
14 Sfil digested and ligated into Sfil-digested pCH036, giving rise to pLK094, pLK095, pLK096, and  
15 pLK097. The two-monomer Tf\_I promoter in pLK050 was derived from a synthetic DNA  
16 fragment. Primers were designed to amplify M2, M1, and T. The resulting PCR products were  
17 digested and ligated into pCH036, resulting in pLK057, pLK056, and pLK054. The antisense  
18 version of the tether fragment was similarly cloned into pLK055. M2-T sequence in pLK098 and  
19 M1-T sequence in pLK047 were derived from synthetic DNA fragments.

20

21 The three-monomer A\_I consensus promoter in pLK085 was derived from a synthetic DNA  
22 fragment. Primers were designed to serially truncating M3 by 40-, 80-, 122-, and 160-bp from  
23 the 5' end. The resulting PCR products were Sfil digested and ligated into Sfil-digested  
24 pCH036, giving rise to pLK090, pLK091, pLK092, and pLK093. The two-monomer A\_I promoter  
25 in pLK049 was derived from a synthetic DNA fragment. Primers were designed to amplify M2,  
26 M1, M1-T and T. The resulting PCR products were digested and ligated into pCH036, resulting

1 in pLK053, pLK052, pLK040 and pLK041. The antisense version of the tether fragment was  
2 similarly cloned into pLK042. M2-T sequence in pLK046 was derived from a synthetic DNA  
3 fragment.

4  
5 The two-monomer G\_I consensus promoter in pLK051, the M2-T promoter in pLK099, the M1-T  
6 promoter in pLK048 were derived from separate synthetic DNA fragments. Primers were  
7 designed to amplify M2 and M1, respectively. The resulting PCR products were digested and  
8 ligated into pCH036, resulting in pLK063 and pLK062. Two different lengths of tether were  
9 considered. Primers were designed to amplify and clone the tether as a 313 bp fragment in  
10 either sense (pLK060) or antisense orientation (pLK061). A shortened 249 bp version of the  
11 tether was also cloned in either sense (pLK058) or antisense (pLK059) orientations.

12  
13 The two-monomer consensus promoters for A\_II (pLK087), Tf\_II (pLK088), and Tf\_III (pLK089)  
14 were derived from separate synthetic DNA fragments. All synthetic DNA fragments were  
15 purchased from either Genewiz (part of Azenta Life Sciences) or Twist Biosciences. pJT01,  
16 pJT02, pJT03, pJT04, pJT05, pJT06, and pJT07 contain antisense versions of the 2-monomer  
17 promoters in pLK049, pLK050, pLK051, pLK087, pLK088, pLK089 and of the L1RP promoter in  
18 pCH117, respectively. To make these antisense promoter constructs, primers were designed to  
19 amplify the sense-oriented promoters from the respective precursor constructs so resulting PCR  
20 fragments would reverse the orientation of the promoter with respect to the two heterotypic SfiI  
21 sites.

### 22 23 ***Cell line authentication***

24 All promoter assays were performed in a subline of NIH/3T3 mouse embryonic fibroblast cells  
25 maintained in our lab. To confirm cell identity, we submitted an aliquot of the cells to American  
26 Type Culture Collection (ATCC) for mouse short tandem repeat (STR) testing. The testing



1 involved the analysis of 18 mouse STR loci as well as two specific markers to screen for  
2 potential cell line contamination by human or African green monkey species (56). The STR  
3 profile of our cells is nearly identical to the ATCC reference NIH/3T3 cell line (ATCC CRL-1658).  
4 Specifically, our subline shares all 26 alleles that are present in ATCC NIH/3T3 at the 18 mouse  
5 STR loci analyzed. In addition, it has evolved a second allele at the STR locus 6-4 (the new  
6 allele is one repeat longer than the reference allele). The complete cell line authentication report  
7 is available as a supplemental document (Additional file 2: Fig.S6).

8

### 9 ***Dual-luciferase promoter assay***

10 Assays were performed with NIH/3T3 cells in 96-well format. Cells were first trypsinized from a  
11 stock dish, diluted into a suspension at 200,000 cells per ml, and kept at 37°C before seeding  
12 into a 96-well plate. Lipofectamine 3000 (Invitrogen) was used following a reverse transfection  
13 protocol. Briefly, for each plasmid, two separate tubes were prepared. In one tube, 0.3 µL of  
14 Lipofectamine 3000 was diluted and well mixed into 10 µL of Opti-MEM I reduced serum  
15 medium (Gibco). In the other tube, 10 µL of Opti-MEM I was first mixed with 0.45 µL of the  
16 P3000 reagent by vortexing and then mixed with 45 ng of plasmid DNA (up to 1.75 µL volume)  
17 by flicking. The two tubes were then combined, mixed by a brief vortex, and incubated at room  
18 temperature for 10 min. For each plasmid, 5 µL of the above DNA/Lipofectamine complex was  
19 added to each well for a total of four wells. The amount of plasmid DNA was equivalent to 10 ng  
20 for each well, which was determined to be optimal in a separate titration experiment (Fig.2B-C).  
21 Then 100 µL of cells (20,000 cells) were added to each well, mixed with the transfection  
22 complex, and returned to a CO<sub>2</sub> incubator for 48 hours. To measure promoter activity, cells  
23 were processed using Promega's Dual-Luciferase Reporter Assay System. To minimize assay  
24 background, all steps were conducted in dark. Firefly luciferase and Renilla luciferase signals  
25 were sequentially measured on a GloMax Multi Detection System (Promega). Signal integration

1 time was set to one second per well. Mock transfected cells and empty wells were included to  
2 evaluate the assay background.

3

#### 4 ***Data analysis and statistics***

5 The raw luminescence readouts were processed in Excel in a stepwise manner. First, the Fluc  
6 signal was normalized to the corresponding Rluc signal for each well. Second, the average  
7 Fluc/Rluc ratio for the no-promoter vector, pLK037, was calculated from its four replicate wells.  
8 Third, the Fluc/Rluc ratio of each well was divided by the average pLK037 ratio from step 2  
9 above. This step effectively sets the average Fluc/Rluc ratio of pLK037 to 1, which represents  
10 the assay background. Lastly, the normalized promoter activity for each promoter construct was  
11 calculated as the average of the normalized Fluc/Rluc ratios among the four replicate wells. The  
12 corresponding standard error was calculated as the standard deviation divided by the square  
13 root of the number of replicates. Statistical comparison between any two promoter constructs  
14 was performed in RStudio using the Basic Statistics and Data Analysis (BSDA) package version  
15 1.2.1, using Welch modified two-sample unpaired t-test assuming unequal variance. Simple  
16 linear regression was conducted with the “stats” base package of R version 3.6. The  
17 significance level was set at 0.05 for all statistical tests.

18

#### 19 **Figure Legends**

20

21 **Figure 1. Phylogenetic relationship and promoter length distribution of young mouse L1**  
22 **subfamilies. (A)** A partial mouse L1 phylogenetic tree that consists of the youngest subfamilies.  
23 Adapted from Figure 1 of Sookdeo et al (34) under Creative Commons Attribution 4.0  
24 International License (<https://creativecommons.org/licenses/by/4.0/>). The tree was built with the  
25 longest non-recombining region of ORF2 sequences using the maximum-likelihood method. The  
26 numbers indicate the percentage of time the labeled node was present in 1000 bootstrap

1 replicates of the data. Downward arrows indicate the acquisition of a new 5'UTR. The age of  
2 each subfamily, in million years (Myr), was estimated by calculating the average pairwise  
3 divergence of the 3'UTR and converting the divergence to time assuming a neutral rodent  
4 genomic substitution rate of 1.1% per million year (see Table 1 of the original publication). We  
5 applied styling changes to highlight the Tf, Gf, and A subfamilies. **(B)** Distribution of the 5'UTR  
6 start position in different L1 subfamilies. For each subfamily, the number of L1 loci is tallied  
7 according to their starting nucleotide position relative to the tether (T), the first ten individual  
8 monomers (M1 to M10), M11 and beyond (M11+). **(C)** Inverse relationship between the average  
9 number of monomers and subfamily age. A simple linear regression line and the corresponding  
10 equation were shown along with individual data points.

11

12 **Figure 2. Comparison of sense and antisense promoter activities for two-monomer**

13 **mouse L1 5'UTR consensus sequences. (A)** Schematic of the dual-luciferase L1 promoter

14 reporter assay vectors. An L1 promoter, cloned in via flanking Sfil sites, drives the firefly

15 luciferase (Fluc) expression. A built-in Renilla luciferase (Rluc) expression cassette is used to

16 normalize transfection efficiency. Each reporter cassette ends in a polyadenylation signal

17 (illustrated as letter A in a hexagon). Amp, ampicillin resistance gene; HSV-TK, herpes simplex

18 virus thymidine kinase promoter; Puro, puromycin resistance gene. Not drawn to scale. **(B)**

19 Titration of plasmid DNA for the cell-based reporter assay. Amount of plasmid DNA is titrated in

20 NIH/3T3 cells in quadruplicate using a control vector in which the promoter of human L1RP

21 drives Fluc expression. The mean and standard error are shown for both Fluc and Rluc signals

22 in raw relative luminescence units (RLU). **(C)** The calculated ratio of Fluc/Rluc from above

23 titration experiment. Mean and standard error are shown. **(D)** Normalized activity of two-

24 monomer consensus promoter sequences from six mouse L1 subfamilies. Sequence

25 organization of the promoters is illustrated on the left side. The length of M2, M1, and tether (T)

26 for each promoter is annotated (in base pairs). For each subfamily, the promoter activity was

1 tested in both sense (S) and antisense (AS) orientation. The x-axis indicates the normalized  
2 promoter activity (i.e., the Fluc/Rluc ratio of a control no-promoter vector, pLK037, was set to 1).  
3 Note a broken x-axis is used to contrast sense and antisense promoter activities. (E) Inverse  
4 relationship between the sense promoter activity and subfamily age. A simple linear regression  
5 line was shown along with individual data points.

6

7 **Figure 3. Differential contribution of monomer 2, monomer 1 and tether to overall**

8 **promoter activity.** Normalized promoter activity of individual 5'UTR domains for subfamily Tf\_I  
9 (A), A\_I (C), and Gf\_I (E). Sequence organization of the promoters is illustrated on the left side.

10 The length of M2, M1, and tether for each promoter is annotated (in base pairs). The dashed  
11 line represents domain(s) that were removed in reference to the two-monomer 5'UTR sequence  
12 (M2-M1-T). The tether was tested in both sense (T) and antisense (T\_AS) orientation. A short  
13 version of Gf\_I tether was additionally included (T249 and T249\_AS) in panel E. The x-axis  
14 indicates the normalized promoter activity (i.e., the Fluc/Rluc ratio of a control no-promoter  
15 vector, pLK037, was set to 1). Note a broken x-axis was used to highlight the wide range of  
16 promoter activities. On the right hand are 2-D representations of the promoter data for subfamily  
17 Tf\_I (B), A\_I (D), and Gf\_I (F), corresponding to panel A, panel C, and panel E, respectively.  
18 Each domain tested is represented by a filled box. The domains are arranged in the order of  
19 M2, M1, and tether from left to right. The height of the box corresponds to the normalized  
20 promoter activity (to scale). The hatched lines represent the missing M1 domain in the M2-T  
21 promoter construct.

22

23 **Figure 4. Contribution of different lengths of monomer 3 to overall promoter activity. (A)**

24 Distribution of 5'UTR start positions for 157 Tf\_I loci that are 5' truncated within M3. The x-axis  
25 represents nucleotide positions from 1 to 212 for M3. The y-axis displays the count of Tf\_I loci  
26 that start at each nucleotide position. The three most frequent nucleotide positions are

1 annotated. **(B)** Distribution of 5'UTR start positions for 357 A\_I loci that are 5' truncated within  
2 M3. **(C)** Normalized promoter activity of Tf\_I 5'UTR consensus sequences with varying M3  
3 length. Sequence organization of the promoters is illustrated on the left side. The length of M2,  
4 M1, and T for each promoter is annotated (in base pairs). The x-axis indicates the normalized  
5 promoter activity. Note promoter constructs in panel C were tested together in the same 96-well  
6 plate with those for Fig.3A; thus, L1RP, M3-M2-M1-T and M2-M1-T are shared between Fig.3A  
7 and Fig.4C. **(D)** Normalized promoter activity of A\_I 5'UTR consensus sequences with varying  
8 M3 length. Note promoter constructs in panel D were tested together with those for Fig.3B.

9

## 10 **List of abbreviations**

11

12 5'UTR, 5' untranslated region; GFP, green fluorescent protein; L1, long interspersed element  
13 type 1; M1, monomer 1; M2, monomer 2; M3, monomer 3; MYA, million years ago; non-LTR,  
14 non-long terminal repeat.

15

## 16 **Supplemental Information**

17

18 **Additional file 1:** Promoter constructs and corresponding sequences. Table S1, Promoters  
19 assayed in Figure 2. Table S2, Promoters assayed in Figure 3. Table S3, Promoters assayed in  
20 Figure 4. Table S4, Table S4. Copy number of two-monomer promoters and individual  
21 monomer and tether domains in the mouse genome.

22

23 **Additional file 2:** Sequence alignments and cell line authentication report. Figure S1, Alignment  
24 of M2 from A\_I, Gf\_I and Tf\_I subfamilies. Figure S2, Alignment of A\_I monomers. Figure S3,  
25 Alignment of Tf\_I monomers. Figure S4, Alignment of Gf\_I monomers. Figure S5, Alignment of  
26 tether sequences. Figure S6, Cell line authentication report for NIH/3T3.

1

## 2 **Acknowledgements**

3 We thank Arin Smit and Stephan Boissinot for providing mouse L1 consensus sequences, and  
4 all An lab members for their enduring support throughout this project.

5

## 6 **Authors' contributions**

7 LK, KS, JT, CH and CY performed experiments; YH, LW, XG and PY conducted computational  
8 analyses; LK and WA designed the project and wrote the manuscript; SN and WA directed the  
9 project.

10

## 11 **Availability of data and materials**

12 All data generated or analyzed during this study are available from the corresponding author on  
13 reasonable request.

14

## 15 **Competing interests**

16 The authors declare that they have no competing interests.

17

## 18 **Funding**

19 The work was supported by National Institutes of Health [grant numbers R15GM131263 and  
20 R03HD099412]. W.A. was supported, in part, by South Dakota State University Markl Faculty  
21 Scholar Fund.

22

## 23 **References**

24

- 25 1. Burton FH, Loeb DD, Voliva CF, Martin SL, Edgell MH, Hutchison CA, 3rd. Conservation  
26 throughout mammalia and extensive protein-encoding capacity of the highly repeated DNA  
27 long interspersed sequence one. *J Mol Biol.* 1986;187(2):291-304.
- 28 2. Smit AF. Interspersed repeats and other mementos of transposable elements in mammalian  
29 genomes. *Curr Opin Genet Dev.* 1999;9(6):657-63.

- 1 3. Lander ES, Linton LM, Birren B, Nusbaum C, Zody MC, Baldwin J, et al. Initial sequencing  
2 and analysis of the human genome. *Nature*. 2001;409(6822):860-921.
- 3 4. Waterston RH, Lindblad-Toh K, Birney E, Rogers J, Abril JF, Agarwal P, et al. Initial  
4 sequencing and comparative analysis of the mouse genome. *Nature*. 2002;420(6915):520-  
5 62.
- 6 5. Fanning TG. Size and structure of the highly repetitive BAM HI element in mice. *Nucleic  
7 Acids Res*. 1983;11(15):5073-91.
- 8 6. Gebhard W, Zachau HG. Organization of the R family and other interspersed repetitive DNA  
9 sequences in the mouse genome. *J Mol Biol*. 1983;170(2):255-70.
- 10 7. Lerman MI, Thayer RE, Singer MF. Kpn I family of long interspersed repeated DNA  
11 sequences in primates: polymorphism of family members and evidence for transcription.  
12 *Proc Natl Acad Sci U S A*. 1983;80(13):3966-70.
- 13 8. Ostertag EM, Kazazian HH, Jr. Twin priming: a proposed mechanism for the creation of  
14 inversions in L1 retrotransposition. *Genome Res*. 2001;11(12):2059-65.
- 15 9. Han K, Sen SK, Wang J, Callinan PA, Lee J, Cordaux R, et al. Genomic rearrangements by  
16 LINE-1 insertion-mediated deletion in the human and chimpanzee lineages. *Nucleic Acids  
17 Res*. 2005;33(13):4040-52.
- 18 10. Grimaldi G, Skowronski J, Singer MF. Defining the beginning and end of KpnI family  
19 segments. *EMBO J*. 1984;3(8):1753-9.
- 20 11. Loeb DD, Padgett RW, Hardies SC, Shehee WR, Comer MB, Edgell MH, et al. The  
21 sequence of a large L1Md element reveals a tandemly repeated 5' end and several features  
22 found in retrotransposons. *Mol Cell Biol*. 1986;6(1):168-82.
- 23 12. Swergold GD. Identification, characterization, and cell specificity of a human LINE-1  
24 promoter. *Mol Cell Biol*. 1990;10(12):6718-29.
- 25 13. Nur I, Pascale E, Furano AV. The left end of rat L1 (L1Rn, long interspersed repeated) DNA  
26 which is a CpG island can function as a promoter. *Nucleic Acids Res*. 1988;16(19):9233-51.
- 27 14. Schichman SA, Severynse DM, Edgell MH, Hutchison CA, 3rd. Strand-specific LINE-1  
28 transcription in mouse F9 cells originates from the youngest phylogenetic subgroup of LINE-  
29 1 elements. *J Mol Biol*. 1992;224(3):559-74.
- 30 15. Moran JV, Holmes SE, Naas TP, DeBerardinis RJ, Boeke JD, Kazazian HH, Jr. High  
31 frequency retrotransposition in cultured mammalian cells. *Cell*. 1996;87(5):917-27.
- 32 16. Martin SL, Cruceanu M, Branciforte D, Wai-Lun Li P, Kwok SC, Hodges RS, et al. LINE-1  
33 retrotransposition requires the nucleic acid chaperone activity of the ORF1 protein. *J Mol  
34 Biol*. 2005;348(3):549-61.
- 35 17. Wei W, Gilbert N, Ooi SL, Lawler JF, Ostertag EM, Kazazian HH, et al. Human L1  
36 retrotransposition: cis preference versus trans complementation. *Mol Cell Biol*.  
37 2001;21(4):1429-39.
- 38 18. Esnault C, Maestre J, Heidmann T. Human LINE retrotransposons generate processed  
39 pseudogenes. *Nat Genet*. 2000;24(4):363-7.
- 40 19. Myers JS, Vincent BJ, Udall H, Watkins WS, Morrish TA, Kilroy GE, et al. A comprehensive  
41 analysis of recently integrated human Ta L1 elements. *Am J Hum Genet*. 2002;71(2):312-  
42 26.
- 43 20. Pavlicek A, Paces J, Zika R, Hejnar J. Length distribution of long interspersed nucleotide  
44 elements (LINEs) and processed pseudogenes of human endogenous retroviruses:  
45 implications for retrotransposition and pseudogene detection. *Gene*. 2002;300(1-2):189-94.
- 46 21. Smit AF, Toth G, Riggs AD, Jurka J. Ancestral, mammalian-wide subfamilies of LINE-1  
47 repetitive sequences. *J Mol Biol*. 1995;246(3):401-17.
- 48 22. Furano AV, Usdin K. DNA "fossils" and phylogenetic analysis. Using L1 (LINE-1, long  
49 interspersed repeated) DNA to determine the evolutionary history of mammals. *J Biol Chem*.  
50 1995;270(43):25301-4.

- 1 23. Khan H, Smit A, Boissinot S. Molecular evolution and tempo of amplification of human LINE-  
2 1 retrotransposons since the origin of primates. *Genome Res.* 2006;16(1):78-87.
- 3 24. Castro-Diaz N, Ecco G, Coluccio A, Kapopoulou A, Yazdanpanah B, Friedli M, et al.  
4 Evolutionally dynamic L1 regulation in embryonic stem cells. *Genes Dev.* 2014;28(13):1397-  
5 409.
- 6 25. Jacobs FM, Greenberg D, Nguyen N, Haeussler M, Ewing AD, Katzman S, et al. An  
7 evolutionary arms race between KRAB zinc-finger genes ZNF91/93 and SVA/L1  
8 retrotransposons. *Nature.* 2014;516(7530):242-5.
- 9 26. Hwang SY, Jung H, Mun S, Lee S, Park K, Baek SC, et al. L1 retrotransposons exploit RNA  
10 m(6)A modification as an evolutionary driving force. *Nat Commun.* 2021;12(1):880.
- 11 27. Speek M. Antisense promoter of human L1 retrotransposon drives transcription of adjacent  
12 cellular genes. *Mol Cell Biol.* 2001;21(6):1973-85.
- 13 28. Denli AM, Narvaiza I, Kerman BE, Pena M, Benner C, Marchetto MC, et al. Primate-specific  
14 ORF0 contributes to retrotransposon-mediated diversity. *Cell.* 2015;163(3):583-93.
- 15 29. Macia A, Munoz-Lopez M, Cortes JL, Hastings RK, Morell S, Lucena-Aguilar G, et al.  
16 Epigenetic control of retrotransposon expression in human embryonic stem cells. *Mol Cell  
17 Biol.* 2011;31(2):300-16.
- 18 30. Ostertag EM, DeBerardinis RJ, Goodier JL, Zhang Y, Yang N, Gerton GL, et al. A mouse  
19 model of human L1 retrotransposition. *Nat Genet.* 2002;32(4):655-60.
- 20 31. Rosser JM, An W. L1 expression and regulation in humans and rodents. *Front Biosci (Elite  
21 Ed).* 2012;4:2203-25.
- 22 32. Gagnier L, Belancio VP, Mager DL. Mouse germ line mutations due to retrotransposon  
23 insertions. *Mob DNA.* 2019;10:15.
- 24 33. Newkirk SJ, An W. L1 Regulation in Mouse and Human Germ Cells. 2017. In: *Human  
25 Retrotransposons in Health and Disease* [Internet]. Springer International Publishing; [29-  
26 61]. Available from: [http://link.springer.com/chapter/10.1007/978-3-319-48344-3\\_2](http://link.springer.com/chapter/10.1007/978-3-319-48344-3_2).
- 27 34. Sookdeo A, Hepp CM, McClure MA, Boissinot S. Revisiting the evolution of mouse LINE-1  
28 in the genomic era. *Mob DNA.* 2013;4(1):3.
- 29 35. Goodier JL, Ostertag EM, Du K, Kazazian HH, Jr. A novel active L1 retrotransposon  
30 subfamily in the mouse. *Genome Res.* 2001;11(10):1677-85.
- 31 36. Mottez E, Rogan PK, Manuelidis L. Conservation in the 5' region of the long interspersed  
32 mouse L1 repeat: implications of comparative sequence analysis. *Nucleic Acids Res.*  
33 1986;14(7):3119-36.
- 34 37. Boissinot S, Sookdeo A. The Evolution of LINE-1 in Vertebrates. *Genome Biol Evol.*  
35 2016;8(12):3485-507.
- 36 38. Naas TP, DeBerardinis RJ, Moran JV, Ostertag EM, Kingsmore SF, Seldin MF, et al. An  
37 actively retrotransposing, novel subfamily of mouse L1 elements. *EMBO J.* 1998;17(2):590-  
38 7.
- 39 39. DeBerardinis RJ, Kazazian HH, Jr. Analysis of the promoter from an expanding mouse  
40 retrotransposon subfamily. *Genomics.* 1999;56(3):317-23.
- 41 40. Cabot EL, Angeletti B, Usdin K, Furano AV. Rapid evolution of a young L1 (LINE-1) clade in  
42 recently speciated *Rattus* taxa. *J Mol Evol.* 1997;45(4):412-23.
- 43 41. Severynse DM, Hutchison CA, 3rd, Edgell MH. Identification of transcriptional regulatory  
44 activity within the 5' A-type monomer sequence of the mouse LINE-1 retroposon. *Mamm  
45 Genome.* 1992;2(1):41-50.
- 46 42. Kimberland ML, Divoky V, Prchal J, Schwahn U, Berger W, Kazazian HH, Jr. Full-length  
47 human L1 insertions retain the capacity for high frequency retrotransposition in cultured  
48 cells. *Hum Mol Genet.* 1999;8(8):1557-60.
- 49 43. Criscione SW, Theodosakis N, Micevic G, Cornish TC, Burns KH, Neretti N, et al. Genome-  
50 wide characterization of human L1 antisense promoter-driven transcripts. *BMC Genomics.*  
51 2016;17:463.



- 1 44. Li J, Kannan M, Trivett AL, Liao H, Wu X, Akagi K, et al. An antisense promoter in mouse L1  
2 retrotransposon open reading frame-1 initiates expression of diverse fusion transcripts and  
3 limits retrotransposition. *Nucleic Acids Res.* 2014;42(7):4546-62.
- 4 45. Yang N, Kazazian HH, Jr. L1 retrotransposition is suppressed by endogenously encoded  
5 small interfering RNAs in human cultured cells. *Nat Struct Mol Biol.* 2006;13(9):763-71.
- 6 46. Cordaux R, Sen SK, Konkel MK, Batzer MA. Computational methods for the analysis of  
7 primate mobile elements. *Methods Mol Biol.* 2010;628:137-51.
- 8 47. Schichman SA, Adey NB, Edgell MH, Hutchison CA, 3rd. L1 A-monomer tandem arrays  
9 have expanded during the course of mouse L1 evolution. *Mol Biol Evol.* 1993;10(3):552-70.
- 10 48. Zhou M, Smith AD. Subtype classification and functional annotation of L1Md  
11 retrotransposon promoters. *Mob DNA.* 2019;10:14.
- 12 49. Athanikar JN, Badge RM, Moran JV. A YY1-binding site is required for accurate human  
13 LINE-1 transcription initiation. *Nucleic Acids Res.* 2004;32(13):3846-55.
- 14 50. Shehee WR, Chao SF, Loeb DD, Comer MB, Hutchison CA, 3rd, Edgell MH. Determination  
15 of a functional ancestral sequence and definition of the 5' end of A-type mouse L1 elements.  
16 *J Mol Biol.* 1987;196(4):757-67.
- 17 51. Camacho C, Coulouris G, Avagyan V, Ma N, Papadopoulos J, Bealer K, et al. BLAST+:  
18 architecture and applications. *BMC Bioinformatics.* 2009;10:421.
- 19 52. Zhang P, Boisson B, Stenson PD, Cooper DN, Casanova JL, Abel L, et al. SeqTailor: a  
20 user-friendly webserver for the extraction of DNA or protein sequences from next-generation  
21 sequencing data. *Nucleic Acids Res.* 2019;47(W1):W623-W31.
- 22 53. Smit A, Hubley R, Green P. RepeatMasker Open-4.0. 2013-2015 [Available from:  
23 <http://www.repeatmasker.org>.
- 24 54. An W, Davis ES, Thompson TL, O'Donnell KA, Lee CY, Boeke JD. Plug and play modular  
25 strategies for synthetic retrotransposons. *Methods.* 2009;49(3):227-35.
- 26 55. Xie Y, Rosser JM, Thompson TL, Boeke JD, An W. Characterization of L1 retrotransposition  
27 with high-throughput dual-luciferase assays. *Nucleic Acids Res.* 2011;39(3):e16.
- 28 56. Almeida JL, Dakic A, Kindig K, Kone M, Letham DLD, Langdon S, et al. Interlaboratory  
29 study to validate a STR profiling method for intraspecies identification of mouse cell lines.  
30 *PLoS One.* 2019;14(6):e0218412.
- 31

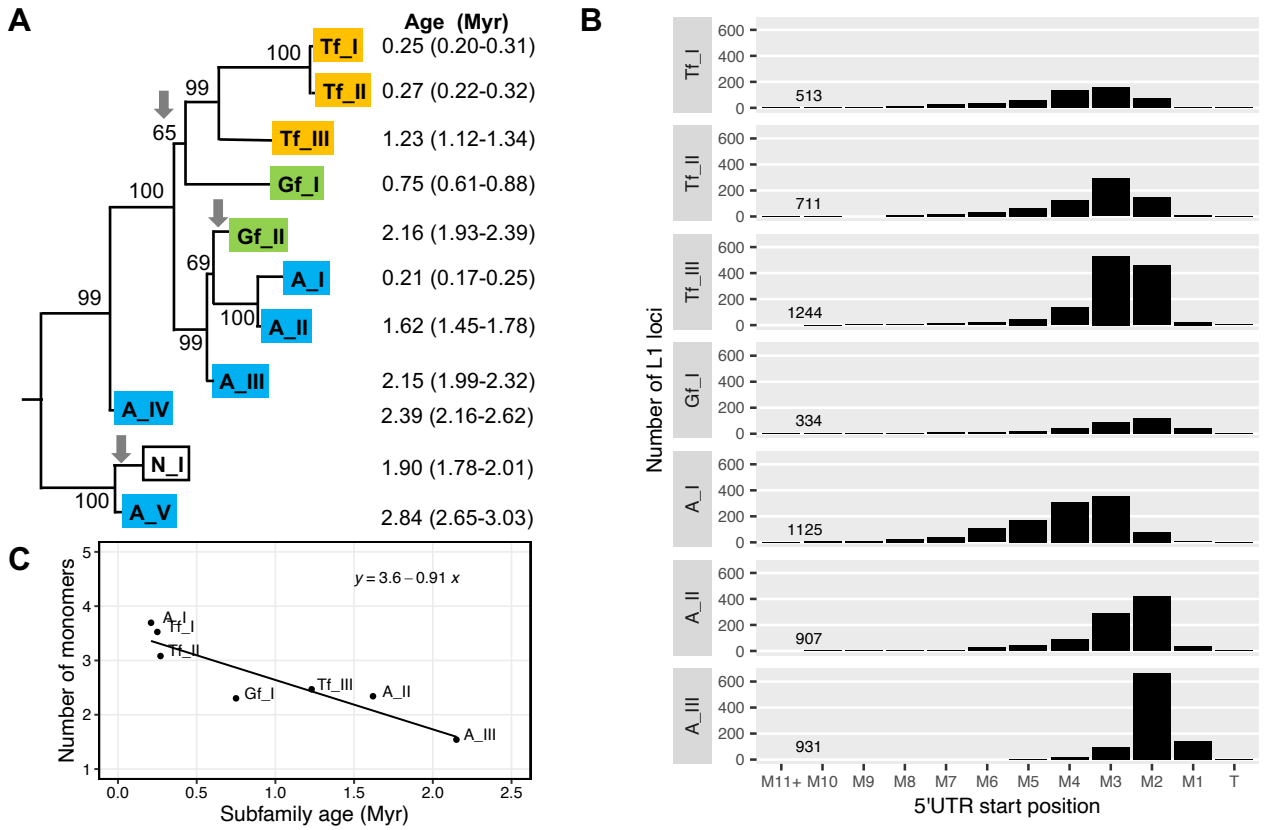

Figure 1

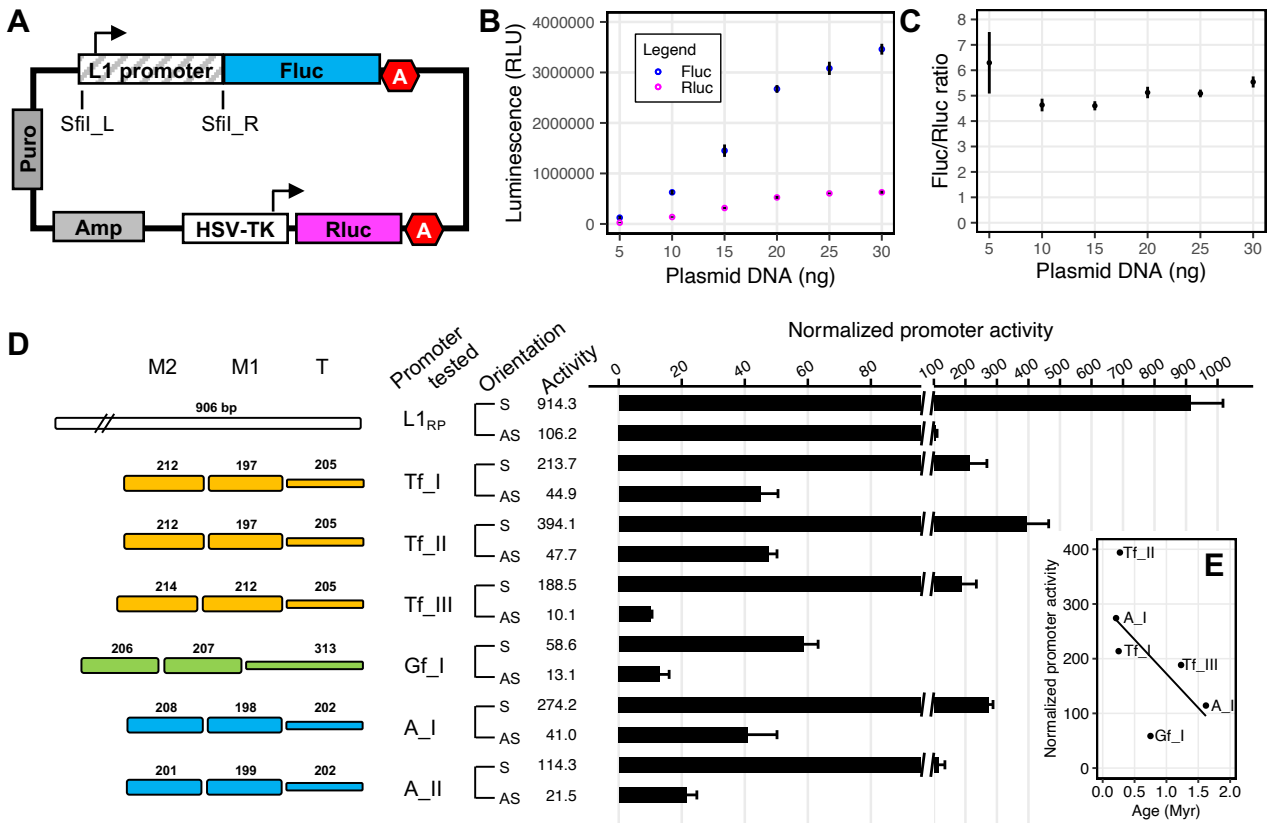

**Figure 2**

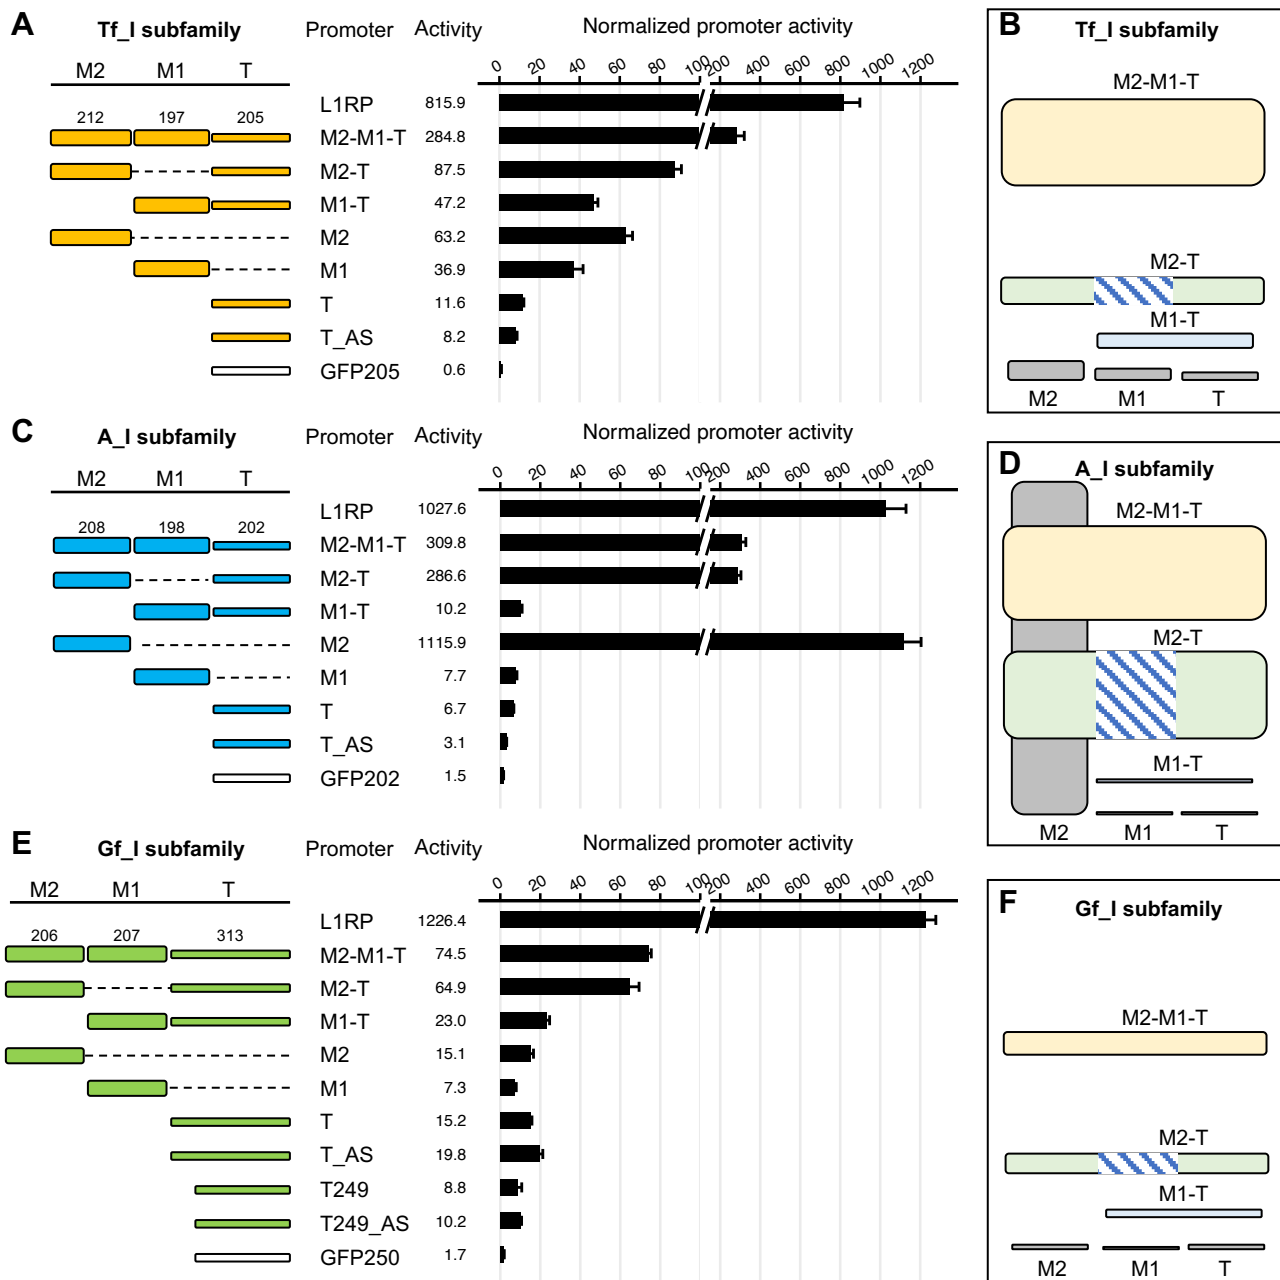

**Figure 3**

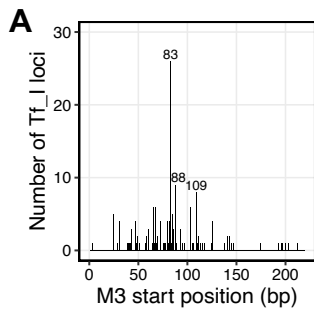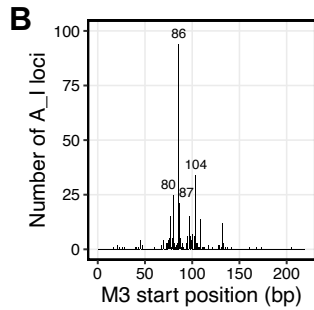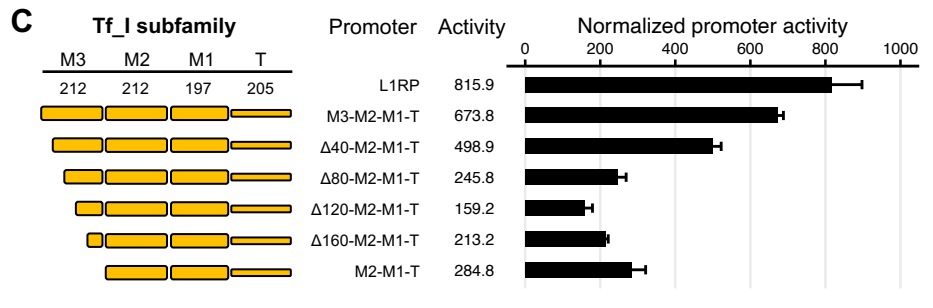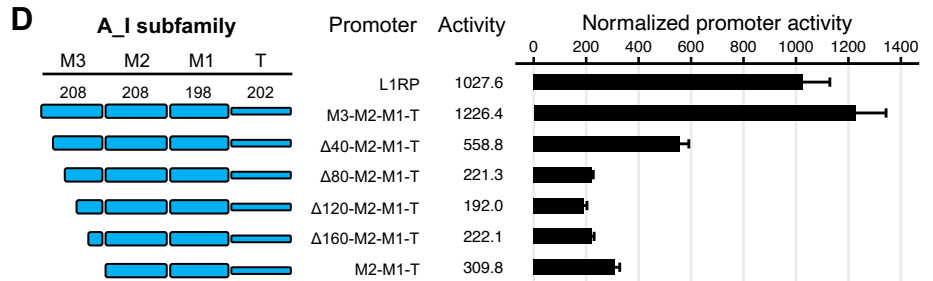

**Figure 4**
